# Supplementary material
Source: bioRxiv or medRxiv preprint supplement (https://www.biorxiv.org/highwire/filestream/78371/field_highwire_adjunct_files/0/255539-1.pdf)

## Supplementary Materials

### **Harnessing a Novel P450 Fatty Acid Decarboxylase from *Macrococcus caseolyticus* for Microbial Biosynthesis of Odd Chain Terminal Alkenes**

Jong-Won Lee<sup>1,2,§</sup>, Narayan P. Niraula<sup>3,§,#</sup>, and Cong T. Trinh<sup>1,2,3,\*</sup>

<sup>1</sup>Bredesen Center for Interdisciplinary Research and Graduate Education, University of Tennessee, Knoxville, TN, USA

<sup>2</sup>Center for Bioenergy Innovation, Oak Ridge National Laboratory, Oak Ridge, TN, USA

<sup>3</sup>Department of Chemical and Biomolecular Engineering, University of Tennessee, Knoxville, TN, USA

§Equal contributions

\*Corresponding author. Email: ctrinh@utk.edu

#Current address: Pfizer Inc, Kalamazoo, MI

**Running title:** Harnessing OleT<sub>MC</sub> for terminal alkene synthesis in *E. coli*

**Supplementary Figure S1.** Alignment of OleT<sub>JE</sub> with the CYP152 P450 enzyme family. The sequences were aligned via MUSCLE and sequence identities were calculated by BLASTp using OleT<sub>JE</sub> as a template.

|                                                                                                             | F <sup>79</sup> | H <sup>85</sup> | R <sup>245</sup> | Identity (%) |
|-------------------------------------------------------------------------------------------------------------|-----------------|-----------------|------------------|--------------|
| 1. ADW41779.1_terminal_olefin-forming_fatty_acid_decarboxylase_Jeotgalicoccus_sp_ATCC_8456                  | L[F]GKGA[H]     |                 | [R]P             | 100          |
| 2. BAA22987.1_fatty_acid_alpha-hydroxylase_Sphingomonas_paucimobilis                                        | LLGQGGVQ        |                 | RP               | 37           |
| 3. NP_349922.1_hypothetical_protein_CA_C3330_Clostridium_acetobutylicum_ATCC_824                            | LLGENAIQ        |                 | RP               | 40           |
| 4. NP_388092.1_fatty-acid_peroxygenase_Bacillus_subtilis_subsp_subtilis_str_168                             | LVGVNAIQ        |                 | RP               | 42           |
| 5. WP_010897918.1_cytochrome_P450_Bacillus_halodurans                                                       | LVGENAIQ        |                 | RP               | 36           |
| 6. WP_011075937.1_cytochrome_P450_Corynebacterium_efficiens                                                 | L[F]GEGAV[H]    |                 | [R]P             | 32           |
| 7. WP_011247882.1_cytochrome_P450_Bacillus_clausii                                                          | LVGKGGVQ        |                 | RP               | 38           |
| 8. WP_011542827.1_cytochrome_P450_Sphingopyxis_alaskensis                                                   | LLVGGVQ         |                 | RP               | 36           |
| 9. WP_011578671.1_cytochrome_P450_Chelativorans_sp._BNC1                                                    | LLVGGVQ         |                 | RP               | 37           |
| 10. WP_012117266.1_MULTISPECIES_cytochrome_P450_Bacillus_amyloliquefaciens_group                            | LVGTGAIQ        |                 | RP               | 42           |
| 11. WP_012200920.1_cytochrome_P450_Lachnoclostridium_phytofermentans                                        | LVGVNAIQ        |                 | RP               | 38           |
| 12. WP_012399225.1_cytochrome_P450_Kocuria_rhizophila                                                       | L[F]GAGAV[H]    |                 | [R]P             | 31           |
| 13. WP_012960819.1_cytochrome_P450_Bacillus_pseudofirmus                                                    | LVGEDAIQ        |                 | RP               | 42           |
| 14. WP_013272538.1_cytochrome_P450_Clostridium_saccharolyticum                                              | LVGVNAIQ        |                 | RP               | 38           |
| 15. WP_013288001.1_MULTISPECIES_cytochrome_P450_Micromonospora                                              | LVGGVQ          |                 | RP               | 37           |
| 16. WP_015880780.1_cytochrome_P450_Exiguobacterium_sp._AT1b                                                 | LVGEGGVQ        |                 | RP               | 35           |
| 17. WP_041635889.1_cytochrome_P450_Macrocooccus_caseolyticus                                                | L[F]GKGA[H]     |                 | [R]P             | 60           |
| 18. ZP_00964321.1_fatty_acid_alpha_hydroxylase_cytochrome_P450_Sulfitobacter_sp._NAS-14.1                   | LVGEGGIQ        |                 | RP               | 34           |
| 19. ZP_01227146.1_acid_alpha_hydroxylase_cytochrome_P450_Aurantimonas_manganoxydans_SI85-9A1                | LVGKHGVQ        |                 | RP               | 35           |
| 20. ZP_01728364.1_fatty_acid_alpha_hydroxylase_cytochrome_P450_Cyanothece_sp._CCY0110                       | LVGKGIQ         |                 | RP               | 37           |
| 21. ZP_02200540.1_Cytochrome_P450-like_protein_Methylobacterium_populi_BJ001                                | LVQDHGSVM       |                 | RP               | 31           |
| 22. ZP_02617555.1_cytochrome_P450_Clostridium_botulinum_Bf                                                  | LVGENAIQ        |                 | RP               | 41           |
| 23. ZP_02994641.1_hypothetical_protein_CLOSPO_01760_Clostridium_sporogenes_ATCC_15579                       | LVGENAIQ        |                 | RP               | 41           |
| 24. ZP_03227611.1_fatty_acid_alpha_hydroxylase_cytochrome_P450_Bacillus_coahuilensis_m4-4                   | LVGEGGVQ        |                 | RP               | 40           |
| 25. ZP_03494465.1_cytochrome_P450_Alicyclobacillus_acidocaldarius_LAA1                                      | LVGENAIQ        |                 | RP               | 40           |
| 26. ZP_04432145.1_fatty_acid_alpha_hydroxylase_Bacillus_coagulans_36D1                                      | LVGENAIQ        |                 | RP               | 38           |
| 27. ZP_06401204.1_fatty_acid_alpha_hydroxylase_cytochrome_P450_Micromonospora_sp._L5                        | LVGGVQ          |                 | RP               | 38           |
| 28. ZP_06874634.1_fatty_acid_beta-hydroxylating_cytochrome_P450_Bacillus_subtilis_subsp_spizizenii_ATCC_663 | LVGVNAIQ        |                 | RP               | 41           |
| 29. ZP_06884025.1_cytochrome_P450_Clostridium_lentocellum_DSM_5427                                          | LVGVNAIQ        |                 | RP               | 36           |

**Supplementary Figure S2.** Characterization of OleT<sub>MC</sub>. **(A)** Reddish exhibition of BL21 ( $\lambda$ DE3)/pNN33 upon expressing OleT<sub>MC</sub>. Negative control: cell culture of BL21 ( $\lambda$ DE3) without carrying OleT<sub>MC</sub>. **(B)** SDS-PAGE analysis of the expressed OleT<sub>MC</sub> in BL21 ( $\lambda$ DE3)/pNN33. Lane M, protein marker; lane 1, total cell extracts of un-induced cells; lane 2, total cell extracts of induced cells; lane 3, soluble fraction of induced cells; lane 4, insoluble fraction of induced cells; lane 5, Ni-NTA semi-purified fraction of induced cells. The arrow indicates the target protein OleT<sub>MC</sub> with predicted mass of ~51 kDa. **(C)** Reduced carbon monoxide difference spectra of semi-purified OleT<sub>MC</sub>

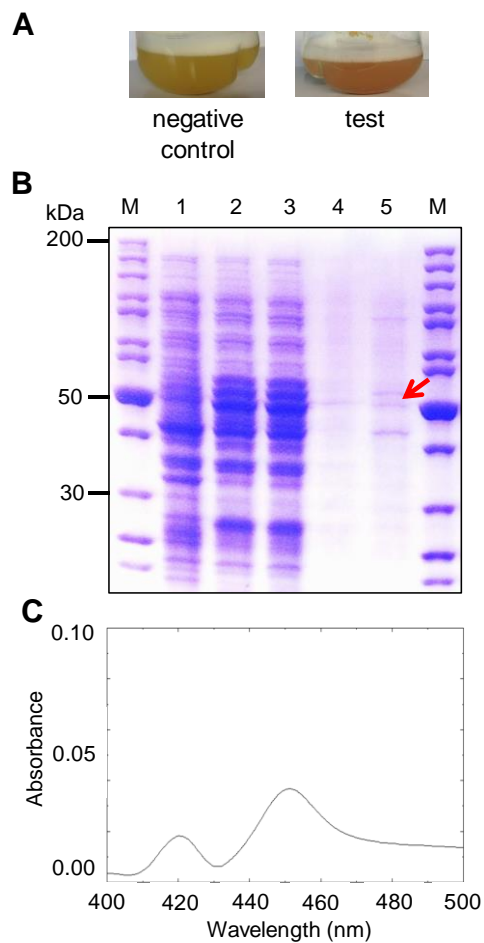

**Supplementary Figure S3: GC/MS chromatograms for *in vitro* biosynthesis of terminal alkenes by OleT<sub>MC</sub> using (A) C10:0 FA, (B) C12:0 FA, (C) C14:0, (D) C16:0 FA, and (E) C18:0.**

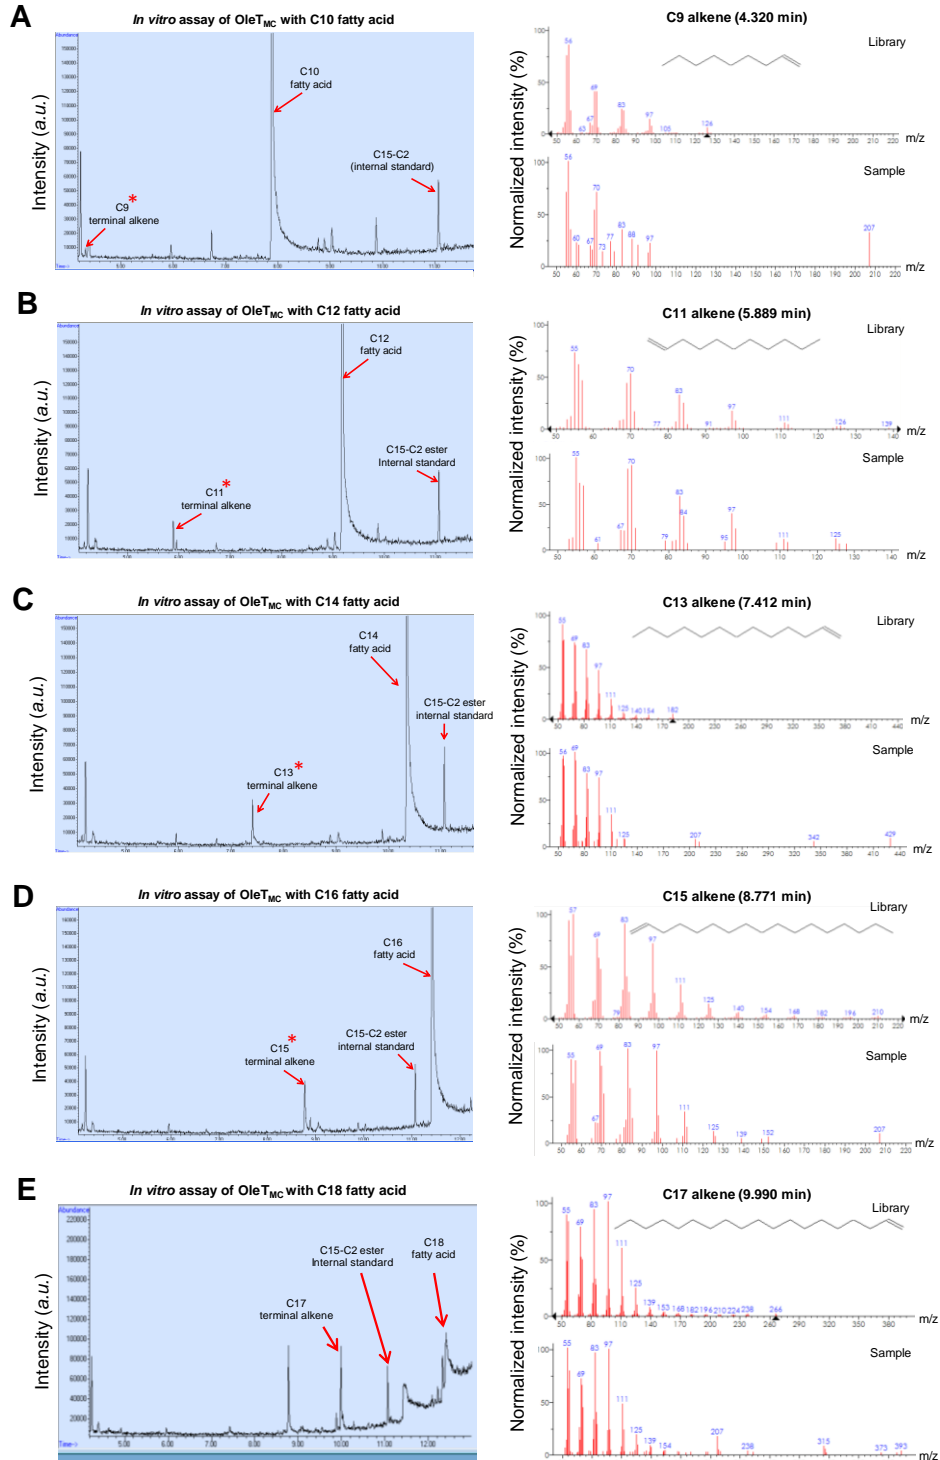

**Supplementary Figure S4:** Ramachandran plot of homology model of OleT<sub>MC</sub>

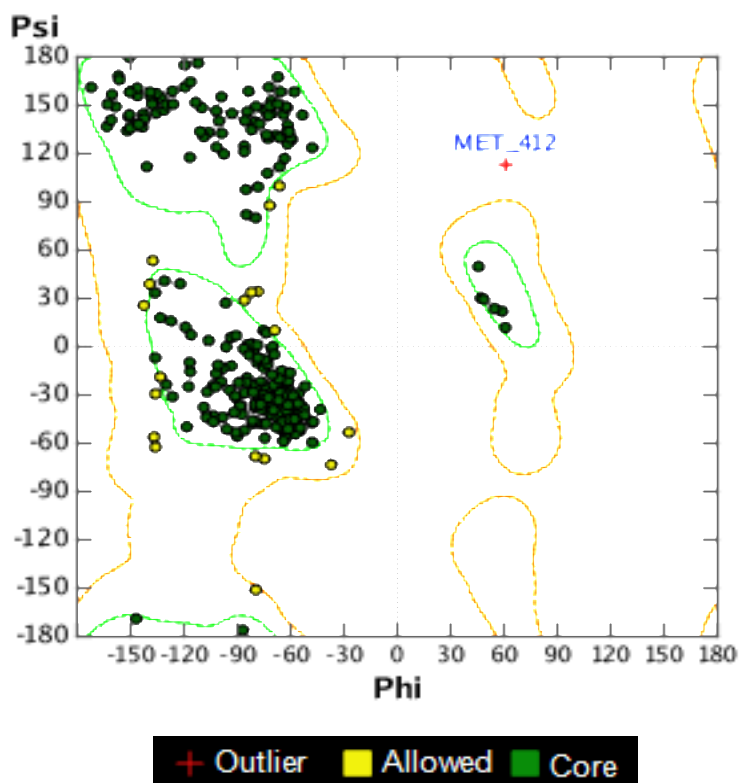

| # Outlier Region | Resides | Psi   | Phi   |
|------------------|---------|-------|-------|
| 1                | Pro295  | -56.5 | -85.7 |
| 2                | Met412  | 113.1 | 61.1  |

**Supplementary Figure S5:** (A) Selected residues for FAs docking (dummy atoms are in purple, potential FA binding site). (B) Molecular surface of potential FA binding site.

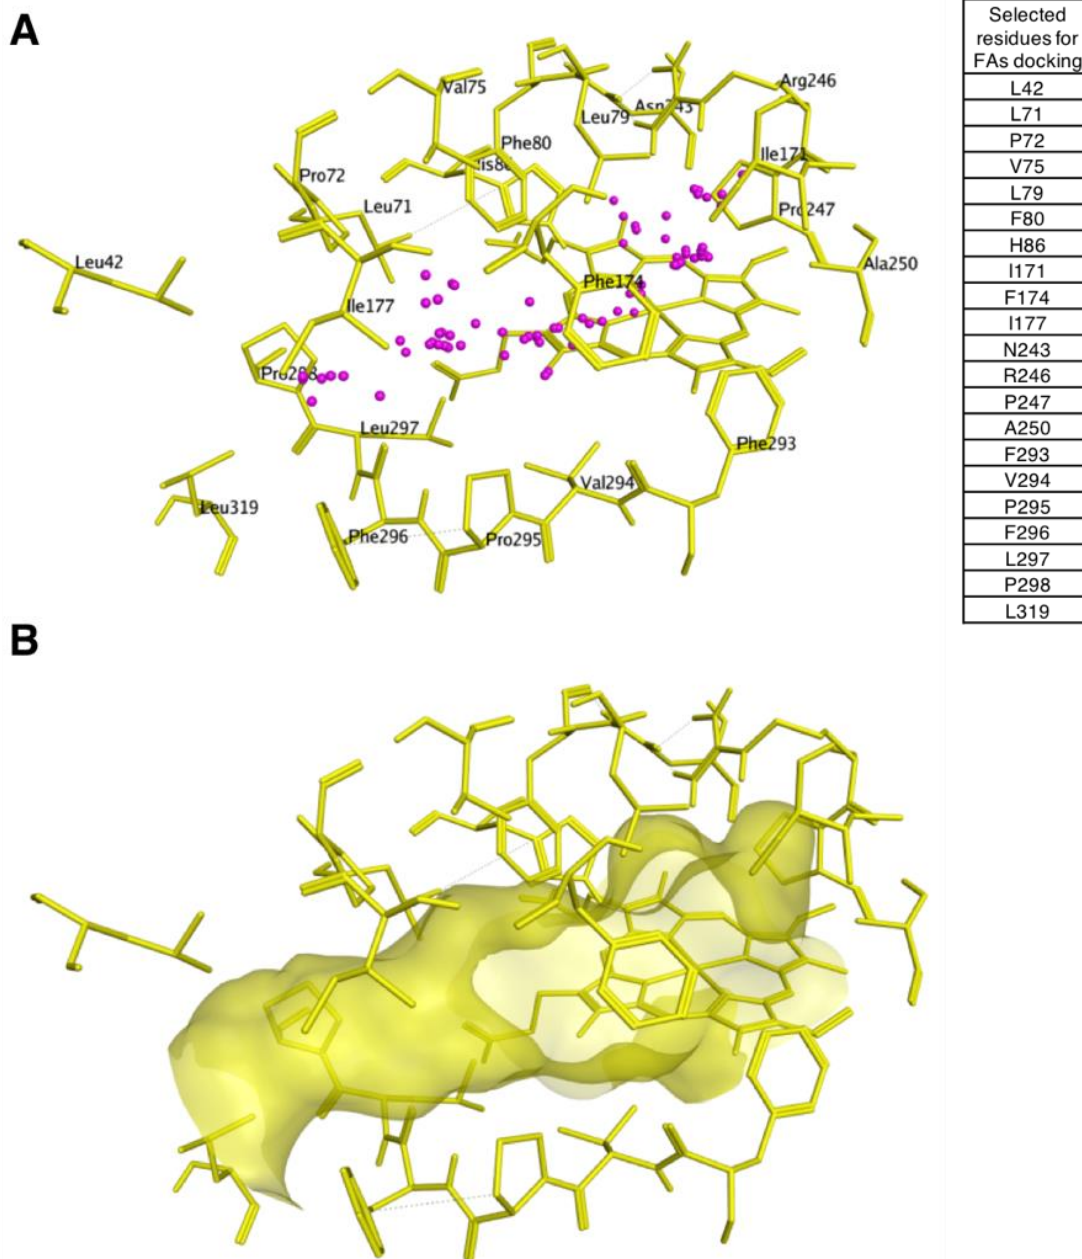

**Supplementary Figure S6: 2D Ligand interaction diagrams for docking various FAs, including (A) C10:0, (B) C12:0, (C) C14:0, (D) C16:0, and (E) C18:0, into the homology model of OleT<sub>MC</sub>.**

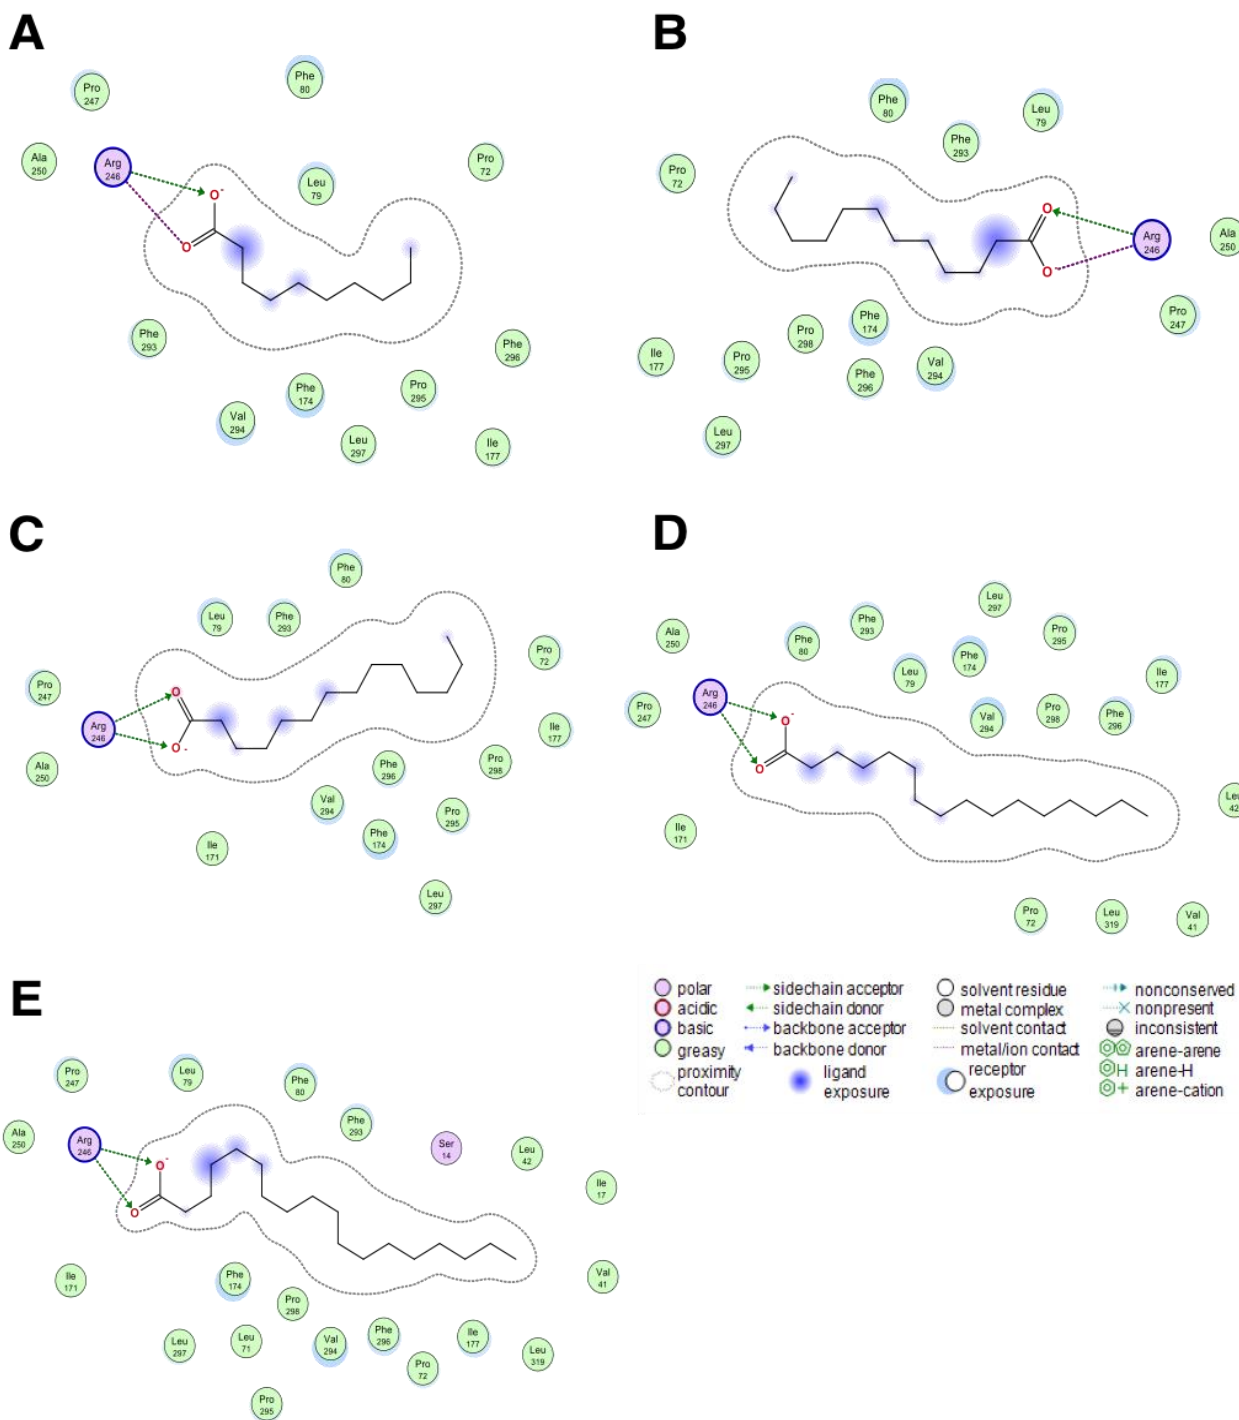

**Supplementary Figure S7: (A-F)** Analysis of  $\Delta$ Stability of the FA (C10:0-C18:0)-bound OleT<sub>MC</sub> mutants **(G)**  $\Delta$ Stability differences between the C18:0 FA and C10:0 FA-bound OleT<sub>MC</sub> mutants.

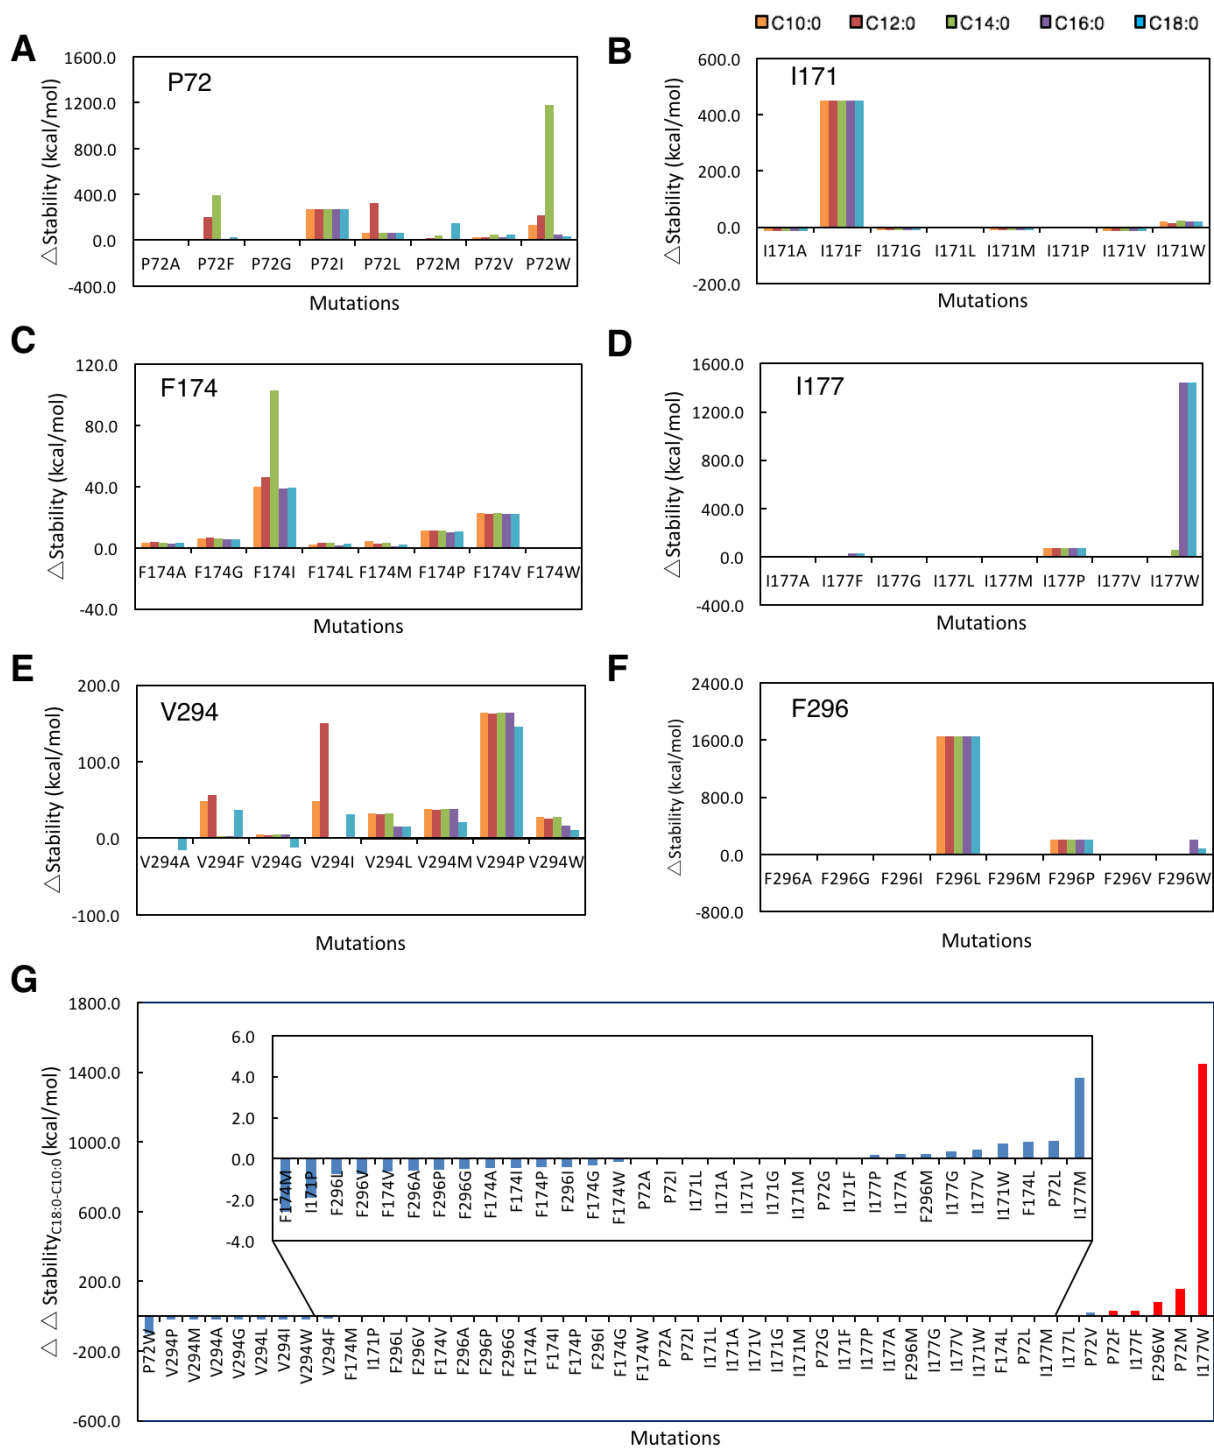



**Supplementary Figure S8:** Normalized peak areas of saturated and unsaturated fatty acids from the GC/MS chromatograms for strains (A) EcNN101 and (B) EcNN201 during 48 h cell culturing.

The peak area of internal standard is used for normalizing the peak area of samples

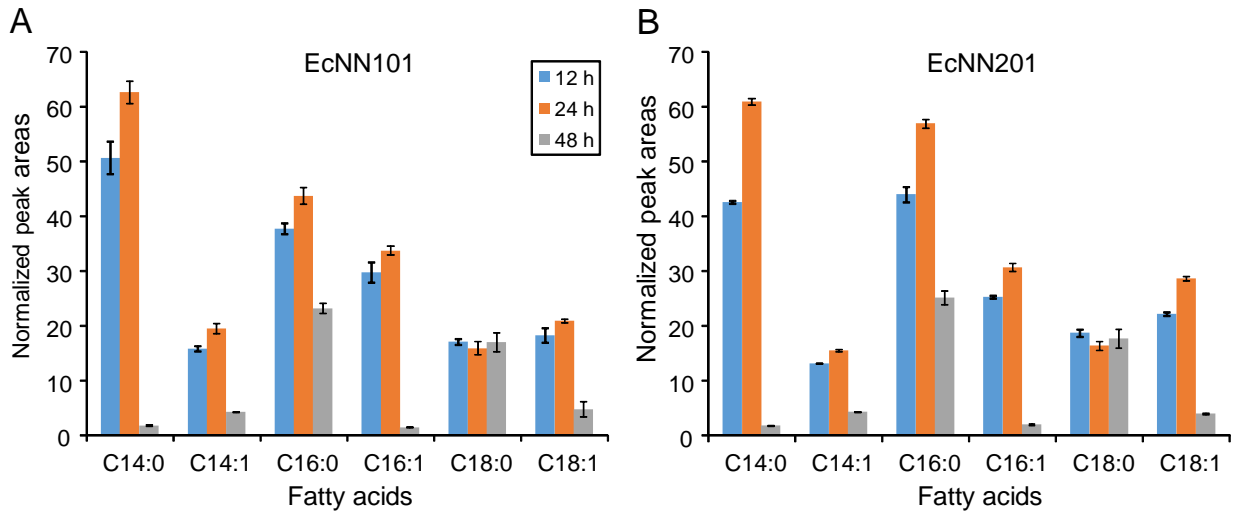

Supplement: Supplementary file [file 255539-1.pdf]
